# Supplementary material for: Similarities, variations, and evolution of cytochrome P450s in Streptomyces versus Mycobacterium
Source: PubMed Central journal article supplement (PMC6408508; doi:10.1038/s41598-019-40646-y), 2019-03-08

## **Similarities, variations, and evolution of cytochrome P450s in *Streptomyces* versus *Mycobacterium***

Louisa Moshoeshoe Senate<sup>1@</sup>, Martin Phalane Tjatji<sup>1@</sup>, Kayla Pillay<sup>2@</sup>, Wanping Chen<sup>3@</sup>, Ntokozo Minenhle Zondo<sup>2</sup>, Puleng Rosinah Syed<sup>4</sup>, Fanele Cabangile Mnguni<sup>2</sup>, Zinhle Edith Chiliza<sup>2</sup>, Hans Denis Bamal<sup>1</sup>, Rajshekhar Karpoornath<sup>4</sup>, Thandeka Khoza<sup>5</sup>, Samson Sitheni Mashele<sup>1</sup>, Jonathan Michael Blackburn<sup>6</sup>, Jae-Hyuk Yu<sup>7,8</sup>, David R Nelson<sup>9\*</sup>, Khajamohiddin Syed<sup>2\*</sup>

<sup>1</sup> Unit for Drug Discovery Research, Department of Health Sciences, Faculty of Health and Environmental Sciences, Central University of Technology, Bloemfontein 9300, Free State, South Africa

<sup>2</sup> Department of Biochemistry and Microbiology, Faculty of Science and Agriculture, University of Zululand, KwaDlangezwa 3886, KwaZulu-Natal, South Africa

<sup>3</sup> College of Food Science and Technology, Huazhong Agricultural University, Wuhan, Hubei Province, China

<sup>4</sup> Department of Pharmaceutical Chemistry, College of Health Sciences, University of KwaZulu-Natal, Durban 4000, KwaZulu-Natal, South Africa

<sup>5</sup> Department of Biochemistry, School of Life Sciences, University of KwaZulu-Natal (Pietermaritzburg campus), Scottsville, 3209, KwaZulu-Natal, South Africa

<sup>6</sup> Institute of Infectious Disease & Molecular Medicine; Department of Integrative Biomedical Sciences, Faculty of Health Sciences, University of Cape Town, Cape Town 7925, South Africa

<sup>7</sup> Department of Bacteriology, University of Wisconsin-Madison, 3155 MSB, 1550 Linden Drive, Madison WI 53706, USA

<sup>8</sup> Department of Systems Biotechnology, Konkuk University, Seoul, Republic of Korea.

<sup>9</sup> Department of Microbiology, Immunology and Biochemistry, University of Tennessee Health Science Center, Memphis, TN 38163, USA

@ Authors contributed equally to the work

\* Corresponding authors' email:

[drnelson1@gmail.com](mailto:drnelson1@gmail.com) & [khajamohiddinsyed@gmail.com](mailto:khajamohiddinsyed@gmail.com)

### Taxonomy

- CYP102
- CYP105
- CYP107
- CYP125
- CYP147
- CYP154
- CYP156
- CYP157
- CYP159
- CYP183

0.1

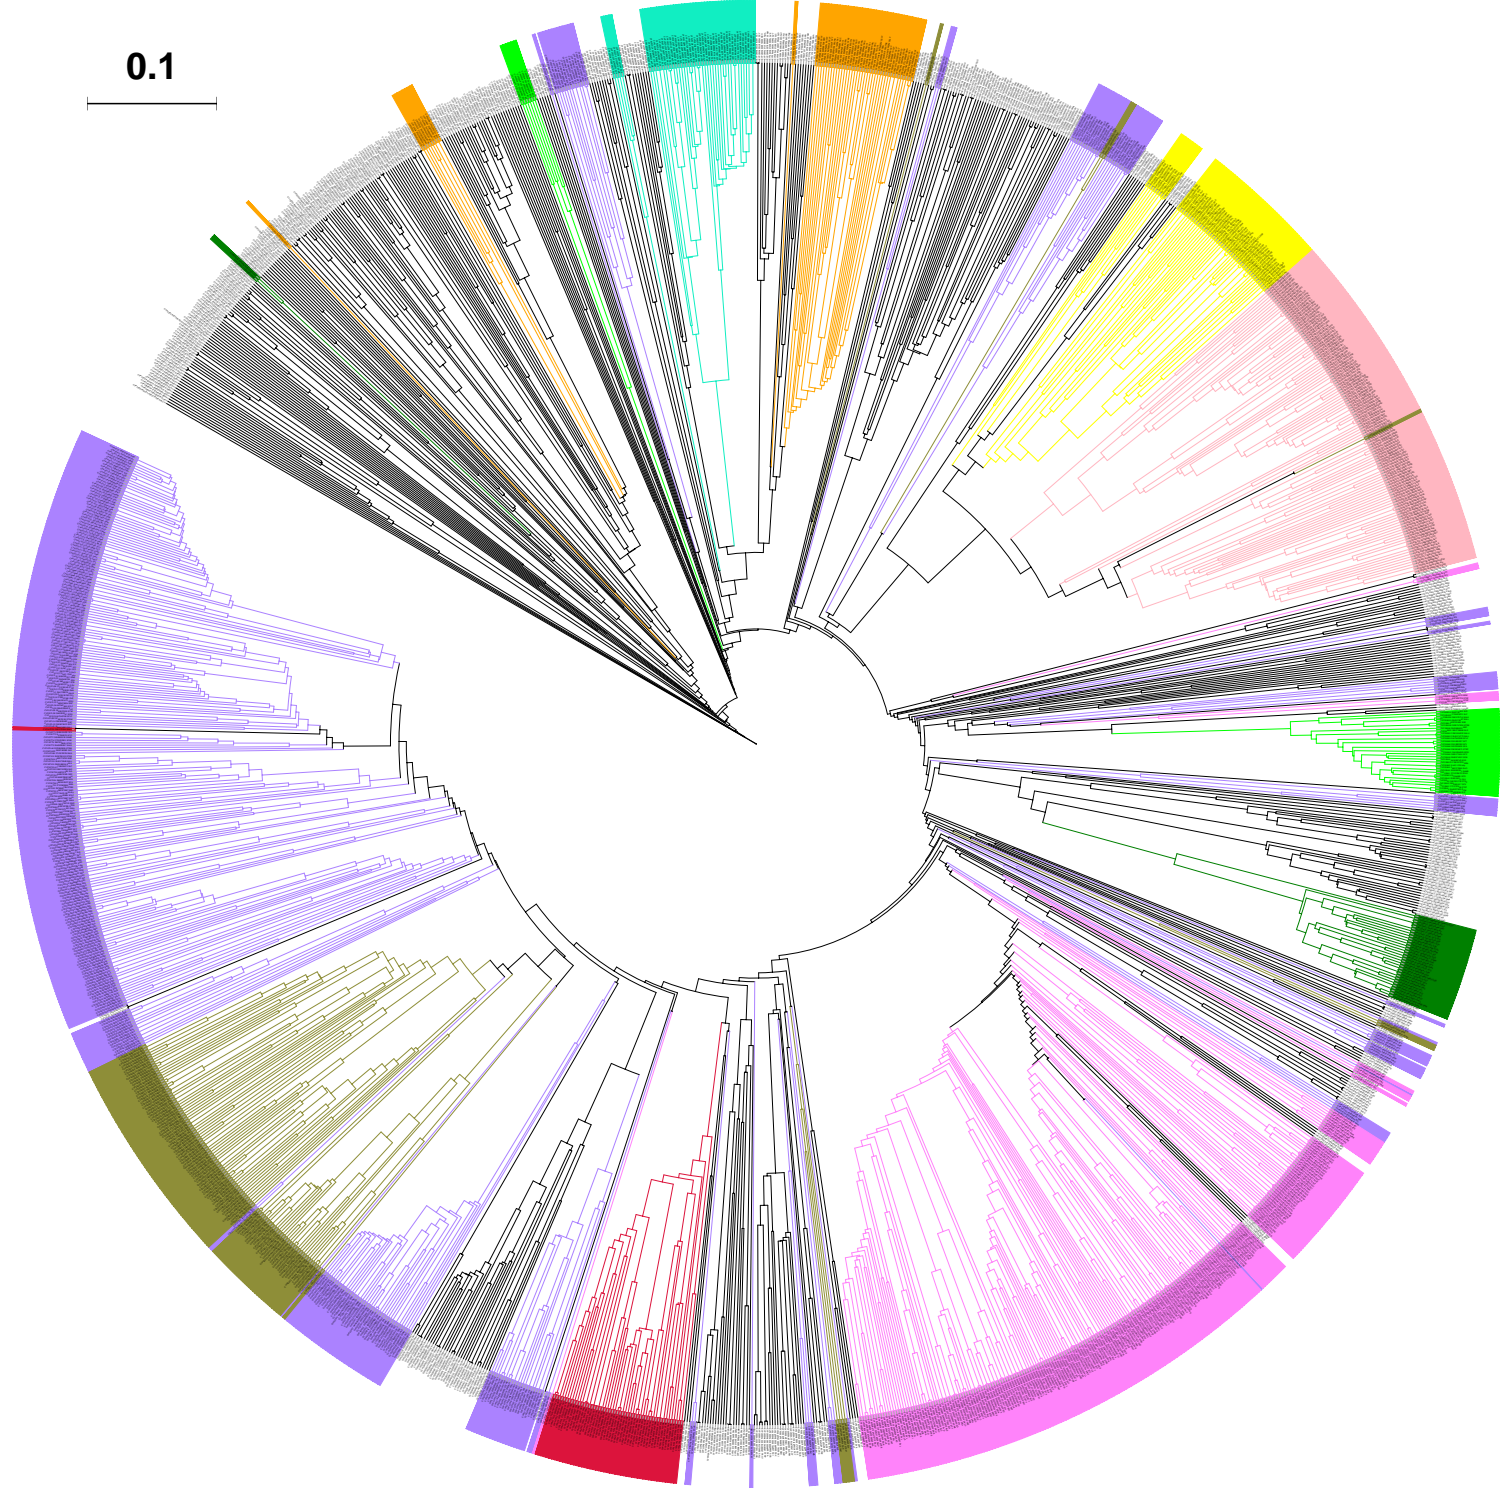

Supplement: 41598_2019_40646_MOESM4_ESM.pdf [file 41598_2019_40646_MOESM4_ESM.pdf]
